# Supplementary material for: Changes in Essential Fatty Acids and Ileal Genes Associated with Metabolizing Enzymes and Fatty Acid Transporters in Rodent Models of Cystic Fibrosis
Source: MDPI journal article supplement (doi:10.3390/ijms24087194), 2023-04-13
Supplement: s1 [file s1]

**Table S1: Dietary fatty acids in the normal and high fat rodent chow and 50:50 mixture.**

| <b>Fatty acids</b>                  | <b>% in normal fat diet<br/>(Teklad Global Soy<br/>Protein-Free Extruded<br/>Rodent Diet)</b> | <b>% in high fat diet<br/>(Teklad Global 19%<br/>Protein Extruded<br/>Rodent Diet)</b> | <b>% in 50:50 mixture</b> |
|-------------------------------------|-----------------------------------------------------------------------------------------------|----------------------------------------------------------------------------------------|---------------------------|
| C16:0 Palmitic                      | 0.60                                                                                          | 0.90                                                                                   | 0.75                      |
| C18:0 Stearic                       | 0.10                                                                                          | 0.20                                                                                   | 0.15                      |
| C18:1 $\omega$ 9 Oleic              | 1.10                                                                                          | 1.70                                                                                   | 1.40                      |
| C18:2 $\omega$ 6 Linoleic (LA)      | 2.60                                                                                          | 3.90                                                                                   | 3.25                      |
| C18:3 $\omega$ 3 Linolenic<br>(ALA) | 0.30                                                                                          | 0.40                                                                                   | 0.35                      |
| Ratio LA/ALA                        | 8.7:1                                                                                         | 9.75:1                                                                                 | 9.3:1                     |
| Total saturated                     | 0.80                                                                                          | 1.20                                                                                   | 1.00                      |
| Total monounsaturated               | 1.10                                                                                          | 1.70                                                                                   | 1.40                      |
| Total polyunsaturated               | 2.90                                                                                          | 4.40                                                                                   | 3.65                      |
| Calories from Fat                   | 16                                                                                            | 22                                                                                     | 19                        |
| Fat                                 | 6.5                                                                                           | 9                                                                                      | 7.75                      |

**Table S2: qPCR primer sequences**

| <b>Gene</b>            | <b>Forward and reverse primer sequences (5' to 3')</b> |
|------------------------|--------------------------------------------------------|
| <i>β-actin</i>         | CTATGAGCTGCCTGACGGTC<br>AGTTTCATGGATGCCACAGG           |
| <i>Cyclophilin A</i>   | GCAGACATGGTCAACCCACCG<br>TGGAACCTTTGTCTGCAAACAGCTCG    |
| <i>Cftr</i>            | AAGCTGAAAGCAGGTGGGAT<br>TGCTCCGACCACAATGAACA           |
| <i>Elovl2</i>          | CTTGTGGTCAAAGCTTCTTC<br>GAGGTATTTCTTCCACCAAAG          |
| <i>Elovl</i>           | TTCTTCGTAAGAACAACCAC<br>ATAGTACGAGTACATGAGGAC          |
| <i>FATP1 (Scl27a1)</i> | GACAGTGTATCATCTACGGG<br>CATATTTACCCGATGTACTGC          |
| <i>FATP2 (Scl27a2)</i> | GGGACTGGTAGATTTTGTTG<br>GTATCTTGTATTCTCAGGAACC         |
| <i>FATP4 (Scl27a4)</i> | CAAGGGTTTTACAGATAAGCTC<br>GGAATCCATAGTACACCAGG         |
| <i>Fads1</i>           | GTACTTCTTCCTGATTGGAC<br>GTAAGTGAAGAAGACACGAAC          |
| <i>Fads2</i>           | CTTCTTCAATGACTGGTTCAG<br>CTTCAGTGAAC TCACAATGTC        |
| <i>Faah</i>            | TCCAAAACCTTCAAAGGTGAC<br>GATACATCTCAATCTCATGCTG        |
| <i>Got2</i>            | CAAAGAATACCTACCCATCG<br>AAATCTTTGCAGAAAGCTGG           |
| <i>Cd36</i>            | AAGGAATTTGTCCTATTGGG<br>GAGACTTCTCAACAAAAGGTG          |
| <i>Col1a1</i>          | TGGTTTGGAGAGAGCATGACCGAT<br>TTGGTCCATGTAGGCTACGCTGTT   |
| <i>Col3a1</i>          | TTTCAAGATCAACACTGAGG<br>TATTCTCCGCTCTTGAGTTC           |
